# Supplementary material for: High TXLNA Expression Predicts Favourable Outcome for Pancreatic Adenocarcinoma Patients
Source: Hindawi journal article supplement (doi:10.1155/2020/2585862), 2020-01-01
Supplement: f1 [file 2585862.f1.pdf]

### Supplementary Figure 1

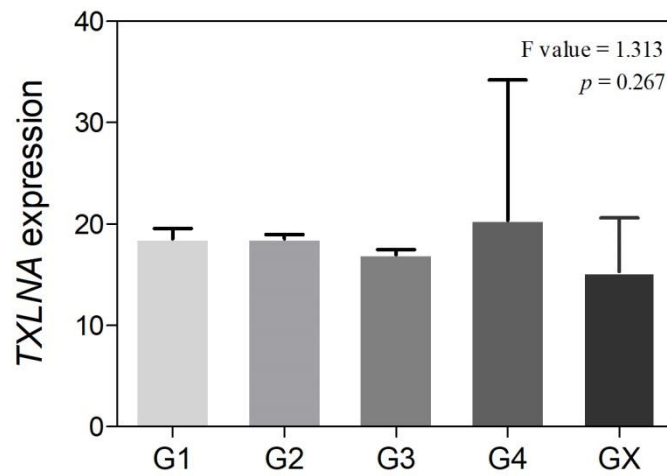

**Supplementary Figure 1.** The *TXLNA* gene expression in PAAD patients with different grades. The histogram indicates the expression level of *TXLNA* gene at different neoplasm histologic grades (G1, G2, G3, G4 and GX) in patients with PAAD in the TCGA. The values were expressed as the mean  $\pm$ S.E.M. A one-way analysis of variance (ANOVA) followed by the Tukey's test for post hoc comparisons was used for the statistical evaluation.
